# Supplementary material for: Case Article—Creating a Brick Empire Through Data Visualization and Analytics
Source: Atypon-hosted journal article supplement (doi:10.1287/ited.2023.0288ca), 2023-06-13
Supplement: ited.2023.0288ca.sm1.xlsx [file ited.2023.0288ca.sm1.xlsx]

## Sheet: 2018 Data
Set #	Name	Theme	Subtheme	Release Month (US)	Piece Count	# of Minifigures	Length (in.)	Width (in.)	Height (in.)	Weight (lb.)	US Retail Price ($)
10260	Downtown Diner	Creator Expert	Modular Buildings	January	2480	6	22.8	14.8	3.9	6.55	169.99
10261	Roller Coaster	Creator Expert	Fairground	June	4124	11	22.9	19.1	7.3	12.78	379.99
10262	James Bond Aston Martin DB5	Creator Expert	Vehicles	August	1290	0	18.9	11.1	3.6	3.4	149.99
10263	Winter Village Fire Station	Creator Expert	Winter Village	October	1166	8	18.8	11	3.4	3.01	99.99
10268	Vestas Wind Turbine	Creator Expert	Vestas	November	826	3	14.8	18.7	4.2	4.75	199.99
10401	Rainbow Fun	Classic		January	85	0	4.8	3.6	2.3	0.22	4.99
10402	Fun Future	Classic		January	186	1	6.2	5.5	2.4	0.75	9.99
10403	World Fun	Classic		January	295	2	10.3	7.5	1.8	0.73125	19.99
10404	Ocean's Bottom	Classic		January	579	2	11.1	10.3	3.8	1.6	29.99
10405	Mission to Mars	Classic		March	871	3	14.6	10.3	7.1	3.42	59.99
10712	Bricks and Gears	Classic		January	244	0	10.3	7.5	2.4	0.88125	19.99
10713	Creative Suitcase	Classic		January	213	0	11.2	10.3	2.5	1.85	19.99
10715	Bricks on a Roll	Classic		January	442	0	8	14	15	1.76	24.99
10717	Extra Large Brick Box	Classic		August	1500	0	18.8	14.8	3.5	4.01	59.99
10748	Emma's Pet Party	Friends	Juniors	January	67	1	6.2	5.5	1.8	0.2625	9.99
10749	Mia's Organic Food Market	Friends	Juniors	January	115	1	10.3	7.5	1.8	0.6	19.99
10750	Road Repair Truck	City	Juniors	January	73	1	6.2	5.5	1.8	0.35	9.99
10751	Mountain Police Chase	City	Juniors	January	115	2	10.3	7.5	1.8	0.6625	19.99
10753	The Joker Batcave Attack	DC Super Heroes	Juniors	January	151	3	10.3	7.5	2.8	0.9	24.99
10754	Spider-Man vs. Scorpion Street Showdown	Marvel Super Heroes	Juniors	January	125	2	10.3	7.5	1.8	0.75	19.99
10755	Zane's Ninja Boat Pursuit	Ninjago	Juniors	January	131	2	10.3	7.5	1.8	0.7	19.99
10756	Pteradon Escape	Jurassic World	Juniors	April	84	2	10.3	7.5	1.8	0.59	19.99
10757	Raptor Rescue Truck	Jurassic World	Juniors	April	85	2	10.3	7.5	1.8	0.68	24.99
10758	T. Rex Breakout	Jurassic World	Juniors	April	150	3	15	10.3	2.2	1.48	49.99
10759	Elastigirl's Rooftop Pursuit	Incredibles 2	Juniors	April	95	2	8.1	7.5	2.4	0.65	19.99
10760	Underminer's Bank Heist	Incredibles 2	Juniors	April	149	3	10.3	7.5	2.4	0.7125	24.99
10761	The Great Home Escape	Incredibles 2	Juniors	April	178	4	13.9	7.5	2.3	1.17	29.99
10762	Belle's Story Time	Disney	Juniors	June	87	2	7.5	5.5	2.4	0.55	14.99
10763	Stephanie's Lakeside House	Friends	Juniors	June	215	3	11.1	10.3	3	1.2	34.99
10764	City Central Airport	City	Juniors	June	376	5	15	10.3	3.7	2	49.99
10765	Ariel's Underwater Concert	Disney	Juniors	August	92	1	7.5	5.5	1.8	0.38125	14.99
21039	Shanghai	Architecture		January	597	0	10.3	7.5	2.8	1.45	59.99
21041	Great Wall of China	Architecture		August	551	0	10.3	7.5	2.8	1.78	49.99
21042	Statue of Liberty	Architecture		June	1685	0	13.9	7.5	4.6	3.17	119.99
21047	Las Vegas	Architecture		September	501	0	10.3	7.5	1.8	0.95	39.99
21138	The Melon Farm	Minecraft		January	69	3	7.5	5.5	1.8	0.35	14.99
21139	The Nether Fight	Minecraft		January	84	3	7.5	5.5	1.8	0.3	14.99
21140	The Chicken Coop	Minecraft		January	198	1	10.3	7.5	2.4	0.79	19.99
21141	The Zombie Cave	Minecraft		January	241	3	10.3	7.5	2.4	0.86	19.99
21142	The Polar Igloo	Minecraft		January	278	2	13.9	7.5	2.8	1.23	29.99
21143	The Nether Portal	Minecraft		January	470	3	11.1	10.3	3	1.54	39.99
21144	The Farm Cottage	Minecraft		January	549	3	15	10.3	3.7	2.2	49.99
21145	The Skull Arena	Minecraft		August	198	2	10.3	7.5	2.8	0.93	19.99
21146	The Skeleton Attack	Minecraft		August	457	4	11.1	10.3	3	1.73	39.99
21147	The Bedrock Adventures	Minecraft		August	644	4	21.3	11.1	3.1	2.8	89.99
21311	Voltron	Ideas		August	2321	0	18.9	14.9	4.4	8.25	179.99
21313	Ship in a Bottle	Ideas		February	962	0	15	10.3	2.8	1.8	69.99
21314	TRON: Legacy	Ideas		April	230	3	10.3	5.5	1.9	0.8	34.99
21315	Pop-Up Book	Ideas		November	859	5	15	10.3	3.7	2.95	69.99
31071	Drone Explorer	Creator		January	109	0	7.5	5.6	1.8	0.37	9.99
31072	Extreme Engines	Creator		January	109	0	7.5	5.6	1.8	0.42	9.99
31073	Mythical Creatures	Creator		January	223	0	10.3	5.6	1.9	0.66	14.99
31074	Rocket Rally Car	Creator		January	241	0	10.3	7.5	2.4	0.97	19.99
31075	Outback Adventures	Creator		January	225	1	10.3	7.5	2.4	0.87	19.99
31076	Daredevil Stunt Plane	Creator		January	200	1	10.3	7.5	1.8	0.7	19.99
31077	Modular Sweet Surprises	Creator		June	396	3	15	10.2	2.1	1.58	39.99
31078	Tree House Treasures	Creator		August	260	2	11	10	2	1.25	29.99
31079	Sunshine Surfer Van	Creator		January	379	2	13.9	7.5	2.3	1.32	34.99
31080	Modular Winter Vacation	Creator		January	374	2	13.9	7.5	2.6	1.35	34.99
31083	Cruising Adventures	Creator		June	597	3	18.9	11.1	2.4	2.62	59.99
31084	Pirate Roller Coaster	Creator		June	923	5	21.3	11.1	3.6	4.27	89.99
31085	Mobile Stunt Show	Creator		June	581	2	18.9	11.1	2.4	2.55	49.99
40187	Flower Display	Seasonal		January	100	0	4.7	3.5	2.2	0.65	5.99
40188	Pencil Pot	Miscellaneous	Desk Accessory	August	187	1	7.5	5.4	2.8	0.63	12.99
40198	LEGO Ludo Game	Miscellaneous	Games	October	389	16	15	10.2	2.1	1.66	39.99
40270	Valentine's Bee	Seasonal	Brickheadz	January	140	0	5.5	4.7	2.4	0.3	9.99
40271	Easter Bunny	Seasonal	Brickheadz	February	126	0	5.5	4.7	2.4	0.25	9.99
40272	Halloween Witch	Seasonal	Brickheadz	September	151	0	5.5	4.7	2.4	0.35	9.99
40273	Thanksgiving Turkey	Seasonal	Brickheadz	October	114	0	5.5	4.7	2.4	0.3	9.99
40274	Mr. & Mrs. Claus	Seasonal	Brickheadz	October	341	0	7.5	5.5	2.8	0.67	19.99
40305	LEGO Brand Store	Miscellaneous		November	362	2	10.3	7.5	2.8	1.11	24.99
40307	Castle Interior Kit	Disney		January	115	0	6.5	4.8	1.8	0.13	9.99
40314	Dr. Fox Magnifying Machine	Unikitty		August	76	0	7.5	5.5	1.8	0.15	8.49
40358	Bean There, Donut That	Miscellaneous			146	4	7.5	5.5	1.8	0.3375	19.99
40388	Mini-Doll Dress-Up Kit	Disney		January	80	0	6.5	4.8	1.8	0.2	9.99
41151	Mulan's Training Day	Disney		January	104	1	6.2	5.5	1.8	0.3	14.99
41152	Sleeping Beauty's Fairytale Castle	Disney		January	322	3	11.1	10.3	3	0.95	39.99
41153	Ariel's Royal Celebration Boat	Disney		January	380	2	15	10.3	2.2	1.43	49.99
41154	Cinderella's Dream Castle	Disney		January	585	2	14.9	13.9	2.8	2.51	69.99
41155	Elsa's Market Adventure	Disney		January	125	2	8.1	7.5	1.8	0.48	19.99
41156	Rapunzel's Castle Bedroom	Disney		August	156	1	8.1	7.5	1.8	0.55	19.99
41157	Rapunzel's Travelling Caravan	Disney		August	323	2	13.9	7.5	2.3	1.19	39.99
41190	Emily Jones & The Eagle Getaway	Elves		January	149	2	7.5	5.5	1.8	0.3375	14.99
41191	Naida & The Water Turtle Ambush	Elves		January	205	2	10.3	7.5	1.8	0.55	19.99
41192	Azari & The Fire Lion Capture	Elves		January	360	3	13.9	7.5	2.3	0.85	29.99
41193	Aira & The Song of the Wind Dragon	Elves		January	451	3	11.1	10.3	2.3	1.29	39.99
41194	Noctura's Tower & The Earth Fox Rescue	Elves		January	646	4	18.9	11.1	2.4	1.95	59.99
41195	Emily & Noctura's Showdown	Elves		June	650	4	15	10.3	2.8	1.75	49.99
41196	The Elvenstar Tree Bat Attack	Elves		June	883	5	21.3	11.1	3.1	2.75	79.99
41287	Bubbles Playground Showdown	The Powerpuff Girls		August	144	3	8.1	7.5	1.8	0.51	19.99
41288	Mojo Jojo Strikes	The Powerpuff Girls		August	228	4	10.3	7.5	2.4	0.81	29.99
41327	Mia's Bedroom	Friends		January	86	1	6.2	5.5	2.4	0.4	9.99
41328	Stephanie's Bedroom	Friends		January	95	1	6.2	5.5	2.4	0.3125	9.99
41329	Olivia's Deluxe Bedroom	Friends		January	163	1	7.5	5.5	2.4	0.45	14.99
41330	Stephanie's Soccer Practice	Friends		January	119	1	7.5	5.5	2.4	0.4	14.99
41332	Emma's Art Stand	Friends		January	210	1	10.3	7.5	2.4	0.7	19.99
41333	Olivia's Mission Vehicle	Friends		January	223	1	10.3	7.5	2.4	0.7	19.99
41334	Andrea's Park Performance	Friends		January	229	3	13.9	7.5	2.3	0.95	24.99
41335	Mia's Tree House	Friends		January	351	2	11.1	10.3	3	1.34	29.99
41336	Emma's Art Café	Friends		January	378	2	13.9	7.5	2.8	1.32	29.99
41338	Stephanie's Sports Arena	Friends		January	460	2	15	10.3	2.8	1.67	44.99
41339	Mia's Camper Van	Friends		January	488	2	18.9	11.1	2.4	2	54.99
41340	Friendship House	Friends		January	722	3	14.9	13.9	3.7	2.51	69.99
41341	Andrea's Bedroom	Friends		June	85	1	6.2	5.5	1.8	0.25	9.99
41342	Emma's Deluxe Bedroom	Friends		June	183	1	7.5	5.5	2.4	0.4375	14.99
41343	Heartlake City Airplane Tour	Friends		August	323	1	15.8	9.8	5.9	1.17	29.99
41344	Andrea's Accessories Store	Friends		August	294	2	13.9	7.5	2.8	1.12	29.99
41345	Heartlake City Pet Centre	Friends		August	474	3	18.9	11.1	2.4	2.18	59.99
41346	Friendship Box	Friends		August	563	0	15	10.3	3.7	2.16	49.99
41347	Heartlake City Resort	Friends		August	1017	4	18.9	14.9	3.7	4.3	99.99
41348	Service & Care Truck	Friends		June	247	1	8.1	7.5	2.9	0.77	19.99
41349	Drifting Diner	Friends		June	345	2	13.9	7.5	2.8	1.19	29.99
41350	Spinning Brushes Car Wash	Friends		August	325	2	13.7	7.5	2.2	1	29.99
41351	Creative Tuning Shop	Friends		June	413	2	15	10.3	2.2	1.48	39.99
41352	Big Race Day	Friends		June	648	3	18.9	11.1	2.9	2.15	59.99
41353	Friends Advent Calendar	Friends		September	500	0	15	10.3	2.8	1.15	29.99
41451	Unikitty Cloud Car	Unikitty		August	126	3	6.2	5.6	1.8	0.31	9.99
41452	Prince Puppycorn Trike	Unikitty		August	101	3	6.2	5.6	1.8	0.33	9.99
41453	Party Time	Unikitty		August	214	4	8.1	7.5	1.8	0.59	19.99
41454	Dr. Fox Laboratory	Unikitty		August	359	4	13.9	7.5	2.3	1.15	29.99
41455	Unikingdom Creative Brick Box	Unikitty		August	433	17	14.5	7.1	7	2.27	39.99
41456	Unikingdom Fairground Fun	Unikitty		August	515	6	15	10.3	2.5	1.55	39.99
41597	Go Brick Me	Miscellaneous	Brickheadz	April	708	0	10.3	8.7	3.7	1.55	29.99
41598	The Flash	DC Super Heroes	Brickheadz	January	122	0	4.8	3.6	3.1	0.2625	9.99
41599	Wonder Woman	DC Super Heroes	Brickheadz	January	143	0	4.8	3.6	3.1	0.2875	9.99
41600	Aquaman	DC Super Heroes	Brickheadz	January	135	0	4.8	3.6	3.1	0.36875	9.99
41601	Cyborg	DC Super Heroes	Brickheadz	January	108	0	4.8	3.6	3.1	0.25	9.99
41602	Rey	Star Wars	Brickheadz	January	119	0	4.8	3.6	3.1	0.25	9.99
41603	Kylo Ren	Star Wars	Brickheadz	January	130	0	4.8	3.6	3.1	0.2775	9.99
41604	Iron Man MK50	Marvel Super Heroes	Brickheadz	April	101	0	4.8	3.6	3.1	0.3	9.99
41605	Thanos	Marvel Super Heroes	Brickheadz	April	105	0	4.8	3.6	3.1	0.3	9.99
41606	Star-Lord	Marvel Super Heroes	Brickheadz	April	113	0	4.8	3.6	3.1	0.3	9.99
41607	Gamora	Marvel Super Heroes	Brickheadz	April	136	0	4.8	3.6	3.1	0.35	9.99
41608	Han Solo	Star Wars	Brickheadz	April	141	0	4.8	3.6	3.1	0.2875	9.99
41609	Chewbacca	Star Wars	Brickheadz	April	149	0	4.8	3.6	3.1	0.3	9.99
41610	Tactical Batman & Superman	DC Super Heroes	Brickheadz	May	209	0	7.5	5.5	2.8	0.45	19.99
41611	Marty McFly & Doc Brown	Back to the Future	Brickheadz	April	240	0	7.5	5.5	2.8	0.53125	19.99
41612	Steve & Creeper	Minecraft	Brickheadz	August	160	0	7.5	5.5	2.8	0.4375	19.99
41613	Mr. Incredible & Frozone	Incredibles 2	Brickheadz	April	160	0	7.5	5.5	2.8	0.46875	19.99
41614	Owen & Blue	Jurassic World	Brickheadz	April	234	0	7.5	5.5	2.8	0.53125	19.99
41615	Harry Potter & Hedwig	Harry Potter	Brickheadz	July	180	0	5.5	4.8	2.4	0.4	14.99
41616	Hermione Granger	Harry Potter	Brickheadz	July	127	0	4.8	3.6	3.1	0.3	9.99
41617	Elsa	Disney	Brickheadz	July	130	0	4.8	3.6	3.1	0.3125	9.99
41618	Anna & Olaf	Disney	Brickheadz	July	201	0	5.5	4.8	2.4	0.41875	14.99
41619	Darth Vader	Star Wars	Brickheadz	July	104	0	4.8	3.6	3.1	0.24	9.99
41620	Stormtrooper	Star Wars	Brickheadz	July	124	0	4.8	3.6	3.1	0.25	9.99
41621	Ron Weasley & Albus Dumbledore	Harry Potter	Brickheadz	July	245	0	7.5	5.5	2.8	0.6625	19.99
41622	Peter Venkman & Slimer	Ghostbusters	Brickheadz	August	228	0	7.5	5.5	2.8	0.55	19.99
41623	Ariel & Ursula	Disney	Brickheadz	July	361	0	7.5	5.5	2.8	0.71875	19.99
41624	Mickey Mouse	Disney	Brickheadz	August	109	0	4.8	3.6	3.1	0.2875	9.99
41625	Minnie Mouse	Disney	Brickheadz	August	129	0	4.8	3.6	3.1	0.2875	9.99
41626	Groot & Rocket	Marvel Super Heroes	Brickheadz	October	189	0	5.5	4.8	2.4	0.4	14.99
41627	Luke Skywalker & Yoda	Star Wars	Brickheadz	October	215	0	5.5	4.8	2.4	0.35	14.99
41628	Princess Leia	Star Wars	Brickheadz	October	124	0	4.8	3.6	3.1	0.3	9.99
41629	Boba Fett	Star Wars	Brickheadz	October	161	0	4.8	3.6	3.1	0.41875	9.99
41630	Jack Skellington & Sally	Nightmare Before Christmas	Brickheadz	October	193	0	7.5	5.5	2.8	0.51875	19.99
41631	Newt Scamander & Gellert Grindewald	Harry Potter	Brickheadz	October	247	0	7.5	5.5	2.8	0.53125	19.99
41632	Homer Simpson & Krusty the Clown	The Simpsons	Brickheadz	October	215	0	7.5	5.5	2.8	0.4875	19.99
42071	Dozer Compactor	Technic		January	171	0	10.3	5.6	2.8	0.73	19.99
42072	WHACK!	Technic		January	135	0	10.3	5.6	2.8	0.66	19.99
42073	BASH!	Technic		January	139	0	10.3	5.6	2.8	0.66	19.99
42074	Racing Yacht	Technic		January	330	0	11.1	10.3	2.3	1.34	39.99
42075	First Responder	Technic		January	513	0	13.9	7.5	3.6	1.89	49.99
42076	Hovercraft	Technic		January	1020	0	18.9	11.1	2.9	3.22	89.99
42077	Rally Car	Technic		January	1005	0	18.9	11.1	4.6	3.74	109.99
42078	Mack Anthem	Technic		January	2595	0	22.9	18.9	4.9	7.62	179.99
42079	Heavy Duty Forklift	Technic		August	592	0	15	10.3	3.7	2.75	69.99
42080	Forest Harvester	Technic		August	1003	0	18.9	14.9	2.8	3.72	149.99
42081	Volvo Concept Wheel Loader ZEUX	Technic		August	1167	0	22.9	14.9	4.6	5.33	139.99
42082	Rough Terrain Crane	Technic		August	4057	0	22.9	18.9	6.7	13.44	299.99
42083	Bugatti Chiron	Technic		June	3599	0	22.4	14.8	5.9	13.04	349.99
42084	Hook Ladder	Technic		January	176	0	6.2	5.6	2.8	0.59	14.99
60170	Off-Road Chase	City	Mountain Police	January	37	2	4.8	3.5	2.2	0.13	6.99
60171	Mountain Fugitives	City	Mountain Police	January	88	4	6.2	5.5	1.8	0.3	9.99
60172	Dirt Road Pursuit	City	Mountain Police	January	297	3	11.1	10.2	2.9	1.32	39.99
60173	Mountain Arrest	City	Mountain Police	January	303	4	15	10.2	2.8	1.67	59.99
60174	Mountain Police Headquarters	City	Mountain Police	January	663	7	18.7	14.7	3.5	3.81	89.99
60175	Mountain River Heist	City	Mountain Police	January	387	4	15	10.2	2.6	1.55	49.99
60176	Wild River Escape	City	Mountain Police	January	126	2	10.2	5.5	1.9	0.51	19.99
60177	Airshow Jet	City		January	87	1	6.2	5.5	2.4	0.35	9.99
60178	Speed Record Car	City		January	78	1	6.2	5.5	2.4	0.25	9.99
60179	Ambulance Helicopter	City		January	190	3	10.3	7.5	2.8	0.9	19.99
60180	Monster Truck	City		January	192	1	10.3	7.5	2.4	0.84	19.99
60181	Forest Tractor	City		January	174	1	10.3	7.5	2.4	0.84	19.99
60182	Pickup & Caravan	City		January	344	3	13.8	7.4	2.7	1.43	29.99
60183	Heavy Cargo Transport	City		January	310	2	13.8	7.4	3.5	1.3	29.99
60184	Mining Team	City	Mining	January	82	4	6.2	5.5	1.8	0.29	9.99
60185	Mining Power Splitter	City	Mining	January	127	1	10.3	5.5	2.4	0.58	19.99
60186	Mining Heavy Driller	City	Mining	January	294	3	15	10.2	2.6	1.71	49.99
60188	Mining Experts Site	City	Mining	January	883	6	18.8	14.8	3.5	4.16	99.99
60190	Arctic Ice Glider	City	Arctic	June	50	1	4	3.6	2.3	0.17	6.99
60191	Arctic Exploration Team	City	Arctic	June	70	3	6.2	5.5	1.8	0.26	9.99
60192	Arctic Ice Crawler	City	Arctic	June	200	1	10.3	7.4	2.3	0.75	24.99
60193	Arctic Air Transport	City	Arctic	June	277	2	11	10.2	2.9	1.3	39.99
60194	Arctic Scout Truck	City	Arctic	June	322	3	15	10.2	2.6	1.59	59.99
60195	Arctic Mobile Exploration Base	City	Arctic	June	786	6	18.8	14.7	2.6	3.43	119.99
60196	Arctic Supply Plane	City	Arctic	June	707	4	21.1	10.9	2.9	2.66	79.99
60197	Passenger Train	City	Trains	August	677	4	22.8	14.7	3.2	4.51	159.99
60198	Cargo Train	City	Trains	August	1226	6	22.8	18.7	4.7	6.68	229.99
60200	Capital City	City		August	1211	13	22.8	14.8	3.9	5.33	149.99
60201	City Advent Calendar	City		September	313	6	15	10.2	2.6	0.94	29.99
60202	People Pack - Outdoor Adventures	City		June	164	15	10.3	7.4	2.4	0.64	39.99
60204	City Hospital	City		June	861	13	18.7	14.7	3.5	3.69	99.99
70638	Katana V11	Ninjago		January	257	2	10.3	7.5	2.4	0.7	19.99
70639	Street Race of Snake Jaguar	Ninjago		January	308	2	13.9	7.5	2.3	0.97	29.99
70640	S.O.G. Headquarters	Ninjago		January	530	5	18.9	11.1	2.4	2	39.99
70641	Ninja Nightcrawler	Ninjago		January	552	3	15	10.3	2.8	1.7	39.99
70642	Killow vs. Samurai X	Ninjago		January	556	3	18.9	11.1	2.4	1.94	49.99
70643	Temple of Resurrection	Ninjago		January	765	8	14.9	13.9	3.7	2.87	69.99
70650	Destiny's Wing	Ninjago		August	181	2	10.3	7.5	2.4	0.73	19.99
70651	Throne Room Showdown	Ninjago		August	221	5	10.3	7.5	2.4	0.75	19.99
70652	Stormbringer	Ninjago		August	493	4	15	10.3	2.2	1.5	39.99
70653	Firstbourne	Ninjago		August	882	6	21.3	11.1	3.1	2.84	69.99
70654	Dieselnaut	Ninjago		August	1179	7	18.9	14.9	3.7	3.85	109.99
70655	Dragon Pit	Ninjago		August	1660	9	22.9	14.9	4.6	5.84	129.99
70657	Ninjago City Docks	Ninjago	LEGO Ninjago Movie	August	3553	14	22.9	18.9	4.9	10.15	229.99
70658	Oni Titan	Ninjago		August	522	4	15	10.3	2.8	1.67	49.99
70918	The Bat-Dune Buggy	LEGO Batman Movie		January	198	2	10.3	5.5	2.4	0.61875	19.99
70919	The Justice League Anniversary Party	LEGO Batman Movie		January	267	4	13.9	7.5	2.3	0.85	29.99
70920	Egghead Mech Food Fight	LEGO Batman Movie		January	293	3	10.3	8.7	2.4	0.9	29.99
70921	Harley Quinn Cannonball Attack	LEGO Batman Movie		January	425	4	15	10.3	2.2	1.54	49.99
70923	The Bat-Space Shuttle	LEGO Batman Movie		January	643	6	14.9	13.9	3.7	2.9	79.99
71043	Hogwarts Castle	Harry Potter		September	6020	28	27	22	16	19.1	399.99
72001	Lance's Hover Jouster	Nexo Knights		January	217	3	10.3	7.5	1.8	0.6375	19.99
72002	Twinfector	Nexo Knights		January	191	3	10.3	7.5	1.8	0.6	19.99
72003	Berserker Bomber	Nexo Knights		January	369	3	13.9	7.5	2.3	1.05	29.99
72004	Tech Wizard Showdown	Nexo Knights		January	506	3	11.1	10.3	2.3	1.4	39.99
72005	Aaron's X-Bow	Nexo Knights		January	569	4	15	10.3	2.2	1.67	49.99
72006	Axl's Rolling Arsenal	Nexo Knights		January	604	4	18.9	11.1	2.4	2.2	59.99
75181	Y-Wing Starfighter	Star Wars	Ultimate Collector Series	May	1967	2	22.9	14.9	4.7	7.65	199.99
75193	Millennium Falcon Microfighter	Star Wars	Microfighters	January	92	1	5.6	4.8	1.8	0.25	9.99
75194	First Order TIE Fighter Microfighter	Star Wars	Microfighters	January	91	1	5.6	4.8	1.8	0.24	9.99
75195	Ski Speeder vs. First Order Walker Microfighters	Star Wars	Microfighters	January	216	2	10.3	5.5	1.9	0.45	19.99
75196	A-Wing vs. TIE Silencer Microfighters	Star Wars	Microfighters	January	188	2	10.3	5.5	1.9	0.48	19.99
75197	First Order Specialists Battle Pack	Star Wars		January	108	4	7.5	5.5	1.8	0.22	14.99
75198	Tatooine Battle Pack	Star Wars		January	97	4	7.5	5.5	1.8	0.3	14.99
75199	General Grievous' Combat Speeder	Star Wars		January	157	2	10.3	7.5	1.8	0.66	29.99
75200	Ahch-To Island Training	Star Wars		January	241	2	10.3	7.5	2.4	0.86	29.99
75201	First Order AT-ST	Star Wars		January	370	4	11.1	10.3	2.3	1.15	39.99
75202	Defense of Crait	Star Wars		January	746	5	21.3	11.1	3.1	2.3	84.99
75203	Hoth Medical Chamber	Star Wars		August	255	4	13.9	7.5	2.3	0.9875	29.99
75204	Sandspeeder	Star Wars		January	278	2	13.9	7.5	2.3	1.02	29.99
75205	Mos Eisley Cantina	Star Wars		January	378	4	11.1	10.3	2.3	1.05	39.99
75206	Jedi and Clone Troopers Battle Pack	Star Wars		April	102	4	7.5	5.5	1.8	0.29	14.99
75207	Imperial Patrol Battle Pack	Star Wars		April	99	4	7.5	5.5	1.8	0.22	14.99
75208	Yoda's Hut	Star Wars		April	229	3	10.3	7.5	2.4	0.84	29.99
75209	Han Solo's Landspeeder	Star Wars		April	345	2	10.3	7.5	2.4	0.93	29.99
75210	Moloch's Landspeeder	Star Wars		April	464	2	11.1	10.3	3	1.43	39.99
75211	Imperial TIE Fighter	Star Wars		April	519	4	14.9	13.9	2.8	1.96	69.99
75212	Kessel Run Millennium Falcon	Star Wars		April	1414	7	22.9	14.9	3.4	5.66	169.99
75213	Star Wars Advent Calendar	Star Wars		September	307	7	15	10.3	2.8	0.95	39.99
75214	Anakin's Jedi Starfighter	Star Wars		August	247	2	10.3	7.5	2.8	0.93	19.99
75215	Cloud-Rider Swoop Bikes	Star Wars		August	355	3	10.3	7.5	2.4	0.81	29.99
75216	Snoke's Throne Room	Star Wars		August	492	5	15	10.3	2.8	1.81	69.99
75217	Imperial Conveyex Transport	Star Wars		August	622	5	18.9	11.1	2.4	2.22	89.99
75218	X-Wing Starfighter	Star Wars		August	731	4	18.9	11.1	2.4	2.33	79.99
75219	Imperial AT-Hauler	Star Wars		August	829	5	18.9	14.9	2.8	3.08	99.99
75220	Sandcrawler	Star Wars		August	1239	6	18.9	14.9	3.7	3.9	129.99
75221	Imperial Landing Craft	Star Wars		August	636	5	14.9	13.9	2.8	2.58	89.99
75222	Betrayal at Cloud City	Star Wars	Master Builder Series	October	2812	21	22.9	18.9	4.9	10.5	349.99
75230	Porg	Star Wars		October	811	0	15	10.3	2.8	2	69.99
75533	Boba Fett	Star Wars	Buildable Figures	January	144	0	10.3	5.5	2.4	0.55	29.99
75534	Darth Vader	Star Wars	Buildable Figures	January	168	0	10.3	7.5	2.4	0.8375	39.99
75535	Han Solo	Star Wars	Buildable Figures	April	101	0	10.3	5.5	2.4	0.55	24.99
75536	Range Trooper	Star Wars	Buildable Figures	April	101	0	10.3	5.5	2.4	0.6125	24.99
75537	Darth Maul	Star Wars	Buildable Figures	April	104	0	10.3	5.5	2.4	0.55	29.99
75884	1968 Ford Mustang Fastback	Speed Champions		March	183	1	7.5	5.6	2.4	0.48	14.99
75885	Ford Fiesta M-Sport WRC	Speed Champions		March	203	1	7.5	5.6	2.4	0.51	14.99
75886	Ferrari 488 GT3 Scuderia Corsa	Speed Champions		March	179	1	7.5	5.6	2.4	0.48	14.99
75887	Porsche 919 Hybrid	Speed Champions		March	163	1	7.5	5.6	2.4	0.6	14.99
75888	Porsche 911 RSR & 911 Turbo 3.0	Speed Champions		March	391	3	13.9	7.5	2.8	1.23	29.99
75889	Ferrari Ultimate Garage	Speed Champions		March	841	7	21.3	11.1	3.1	2.75	99.99
75926	Pteradon Chase	Jurassic World		April	126	2	10.3	7.5	1.8	0.62	19.99
75927	Stygimoloch Breakout	Jurassic World		April	222	2	13.9	7.5	2.3	1.01	29.99
75928	Blue's Helicopter Pursuit	Jurassic World		April	397	3	11.1	10.3	2.3	1.39	39.99
75929	Carnotaurus Gyrosphere Escape	Jurassic World		April	577	3	15	10.3	3.7	2.62	79.99
75930	Indoraptor Rampage at Lockwood Estate	Jurassic World		April	1019	6	18.9	14.9	3.7	4.16	129.99
75931	Dilophasaurus Outpost Attack	Jurassic World		April	289	3	13.9	7.5	2.3	1.1	39.99
75932	Jurassic Park Velociraptor Chase	Jurassic World		April	360	4	13.9	7.5	2.8	1.21	39.99
75933	T. Rex Transport	Jurassic World		April	609	3	15	10.3	3.7	2.49	69.99
75950	Aragog's Lair	Harry Potter		August	157	2	7.5	5.6	1.8	0.35	14.99
75951	Grindewald's Escape	Harry Potter		August	132	2	10.3	5.6	1.9	0.53	19.99
75952	Newt's Case of Magical Creatures	Harry Potter		August	694	4	15	10.3	2.8	1.87	49.99
75953	Hogwarts Whomping Willow	Harry Potter		August	753	6	18.9	11.1	2.9	2.42	69.99
75954	Hogwarts Great Hall	Harry Potter		August	878	10	18.9	14.9	2.8	3.66	99.99
75955	Hogwarts Express	Harry Potter		August	801	6	21.3	11.1	3.1	3.02	79.99
75956	Quidditch Match	Harry Potter		August	500	6	15	10.2	2.2	1.5	39.99
75987	Omnic Bastion	Overwatch			182	0	6.2	5.5	2.3	0.4	25
76089	Mighty Micros: Scarlet Spider vs. Sandman	Marvel Super Heroes	Mighty Micros	January	89	2	5.5	4.8	1.8	0.2	9.99
76090	Mighty Micros: Star-Lord vs. Nebula	Marvel Super Heroes	Mighty Micros	January	86	2	5.5	4.8	1.8	0.2	9.99
76091	Mighty Micros: Thor vs. Loki	Marvel Super Heroes	Mighty Micros	January	79	2	5.5	4.8	1.8	0.2	9.99
76092	Mighty Micros: Batman vs. Harley Quinn	DC Super Heroes	Mighty Micros	October	86	2	5.5	4.8	1.8	0.2	9.99
76093	Mighty Micros: Nightwing vs. The Joker	DC Super Heroes	Mighty Micros	October	84	2	5.5	4.8	1.8	0.2	9.99
76094	Mighty Micros: Supergirl vs. Brainiac	DC Super Heroes	Mighty Micros	October	80	2	5.5	4.8	1.8	0.2	9.99
76095	Black Manta Strike	DC Super Heroes		August	235	3	13.9	7.5	2.3	1	29.99
76096	Superman & Krypto Team-Up	DC Super Heroes	Justice League	January	199	2	10.3	7.5	1.8	0.65	19.99
76097	Lex Luthor Mech Takedown	DC Super Heroes	Justice League	January	406	5	11.1	10.3	2.3	1.05	39.99
76098	Speed Force Freeze Pursuit	DC Super Heroes	Justice League	January	271	4	13.9	7.5	2.2	1	29.99
76099	Rhino Face-Off by the Mine	Marvel Super Heroes	Black Panther	January	229	3	10.3	7.5	2.4	0.8125	19.99
76100	Royal Talon Fighter Attack	Marvel Super Heroes	Black Panther	January	358	4	13.9	7.5	2.8	0.95	29.99
76101	Outrider Dropship Attack	Marvel Super Heroes	Avengers	March	124	4	6.2	5.6	2.4	0.4	14.99
76102	Thor's Weapon Quest	Marvel Super Heroes	Avengers	March	223	3	10.3	7.5	1.8	0.73	19.99
76103	Corvus Glaive Thresher Attack	Marvel Super Heroes	Avengers	March	416	5	11.1	10.3	3	1.45	39.99
76104	The Hulkbuster Smash-Up	Marvel Super Heroes	Avengers	March	375	4	10.3	8.7	2.4	1.08	29.99
76105	The Hulkbuster: Ultron Edition	Marvel Super Heroes	Avengers	March	1363	1	18.9	14.9	3.7	3.55	119.99
76107	Thanos: Ultimate Battle	Marvel Super Heroes	Avengers	March	674	4	21.3	11.1	2.3	2.25	69.99
76108	Sanctum Sanctorum Showdown	Marvel Super Heroes	Avengers	March	1004	5	18.9	14.9	3.7	3.5	99.99
76109	Quantum Realm Explorers	Marvel Super Heroes		June	200	3	10.3	7.5	2.4	0.75	19.99
76110	Batman: The Attack of the Talons	DC Super Heroes	Batman	August	155	3	10.3	7.5	2.4	0.75	19.99
76111	Batman: Brother Eye Takedown	DC Super Heroes	Batman	August	269	3	13.9	7.5	2.3	1.01	29.99
76112	App-Controlled Batmobile	DC Super Heroes	Batman	August	321	1	13.9	7.5	3.6	1.81	99.99

## Sheet: 2019 Data
Set #	Name	Theme	Subtheme	Release Month (US)	Piece Count	# of Minifigures	Length (in.)	Width (in.)	Height (in.)	Weight (lb.)	US Retail Price ($)
10264	Corner Garage	Creator Expert	Modular Buildings	January	2569	6	22.7	18.7	3.4	6.7	199.99
10265	Ford Mustang	Creator Expert	Vehicles	March	1471	0	18.9	11.1	4.7	4.15	149.99
10266	NASA Apollo 11 Lunar Lander	Creator Expert	Space	June	1087	2					99.99
10267	Gingerbread House	Creator Expert	Winter Village	October	1477	2	18.8	10.9	3.5	3.19	99.99
10269	Harley-Davidson Fat Boy	Creator Expert	Vehicles	August	1023	0	18.9	10.9	3	3	99.99
10766	Woody & RC	Toy Story 4	Juniors	April	69	1	7.5	5.5	1.8	0.2	9.99
10767	Duke Caboom's Stunt Show	Toy Story 4	Juniors	April	120	2	10.3	7.5	2.4	0.7	19.99
10768	Buzz & Bo Peep's Playground Adventure	Toy Story 4	Juniors	April	139	3	10.3	7.5	2.8	0.86	24.99
10769	Toy Story 4 RV Vacation	Toy Story 4	Juniors	April	178	3	11.1	10.3	3	1.15	34.99
10770	Buzz & Woody's Carnival Mania!	Toy Story 4	Juniors	April	230	5	15	10.3	2.2	1.25	49.99
10771	Carnival Thrill Coaster	Toy Story 4	Juniors	April	98	2	10.3	7.5	1.8	0.5875	19.99
11001	Bricks and Ideas	Classic		January	123	0	6.2	5.6	2.4	0.37	9.99
11002	Basic Brick Set	Classic		January	300	0	10.3	7.5	2.8	0.97	19.99
11003	Bricks and Eyes	Classic		January	451	0	10.3	8.7	3.2	1.32	29.99
11004	Windows of Creativity	Classic		August	450	0	10.3	8.7	3.7	1.45	29.99
11005	Creative Fun	Classic		January	900	0					39.99
21043	San Francisco	Architecture		January	565	0	10.3	7.5	2.4	1.35	49.99
21044	Paris	Architecture		January	649	0	10.3	7.5	2.8	1.4	49.99
21045	Trafalgar Square	Architecture		August	1197	0	13.9	7.5	3.6	2.51	79.99
21046	Empire State Building	Architecture		August	1767	0	13.9	7.5	4.7	3.2	129.99
21148	Minecraft Steve BigFig with Parrot	Minecraft	BigFigs	January	159	0	7.5	5.6	1.8	0.37	14.99
21149	Minecraft Alex BigFig with Chicken	Minecraft	BigFigs	January	160	0	7.5	5.6	1.8	0.37	14.99
21150	Minecraft Skeleton BigFig with Magma Cube	Minecraft	BigFigs	January	142	0	7.5	5.6	1.8	0.37	14.99
21151	The End Battle	Minecraft		January	222	2	10.3	7.5	2.4	0.84	19.99
21152	Pirate Ship	Minecraft		January	386	3	11.1	10.3	3.8	1.65	39.99
21153	The Wool Farm	Minecraft		July	260	1	10.3	7.5	3.6	1.08	19.99
21154	The Blaze Bridge	Minecraft		August	372	2	13.9	7.5	2.8	1.25	29.99
21155	The Creeper Mine	Minecraft		August	834	4	21.3	11.1	3.6	4.26	79.99
21316	The Flintstones	Ideas		March	748	4	13.9	7.5	4.7	2.3	59.99
21317	Steamboat Willie	Ideas		April	751	2	11.1	10.3	3.8	2.55	89.99
21318	Treehouse	Ideas		August	3036	4	22.8	18.7	4.7	8.37	199.99
21319	Central Perk	Ideas		September	1070	7	15	10.2	3.6	2.98	59.99
21320	Dinosaur Fossils	Ideas		November	910	1					59.99
31086	Futuristic Flyer	Creator		January	157	0	10.3	5.6	1.9	0.59	14.99
31087	Dune Buggy	Creator		January	147	0	7.5	5.6	2.4	0.55	12.99
31088	Deep Sea Creatures	Creator		January	230	0	10.3	5.6	1.9	0.68	14.99
31089	Sunset Track Racer	Creator		January	221	0	10.3	7.5	2.4	0.84	19.99
31090	Underwater Robot	Creator		January	207	0	10.3	7.5	2.4	0.79	19.99
31091	Shuttle Transporter	Creator		January	341	0	13.9	7.5	2.3	1.12	24.99
31092	Helicopter Adventure	Creator		January	114	0	7.5	5.6	1.8	0.42	9.99
31093	Riverside Houseboat	Creator		January	396	2	13.9	7.5	2.8	1.48	39.99
31094	Race Plane	Creator		January	333	1	13.9	7.5	2.8	1.41	29.99
31095	Fairground Carousel	Creator		August	595	3	18.9	11.1	2.4	2.6	49.99
31096	Twin-Rotor Helicopter	Creator		August	569	1	18.9	11.1	2.9	3.2	59.99
31097	Townhouse Pet Shop & Café	Creator		August	969	3	18.7	14.7	2.6	3.74	79.99
31098	Outback Cabin	Creator		August	305	2	14.1	7.5	2.2	1.19	29.99
40197	Wedding Favour Set 2018	Miscellaneous		January	132	2	5.5	4.7	2.4		9.99
40348	Birthday Clown	Seasonal	Brickheadz	January	150	0	5.5	4.8	2.4	0.36	9.99
40349	Valentine's Puppy	Seasonal	Brickheadz	January	150	0	5.5	4.8	2.4	0.35	9.99
40350	Easter Chick	Seasonal	Brickheadz	February	120	0	5.4	4.7	2.4	0.32	9.99
40351	Halloween Ghost	Seasonal	Brickheadz	September	136	0	5.5	4.7	2.4	0.35	9.99
40352	Thanksgiving Scarecrow	Seasonal	Brickheadz	October	177	0	5.5	4.7	2.4	0.37	9.99
40353	Reindeer, Elf & Elfie	Seasonal	Brickheadz	October	281	0	7.5	5.5	2.8	0.63	19.99
40354	Dragon Dance Guy	Seasonal	Brickheadz	January	170	0	5.5	4.7	2.4	0.35	9.99
40360	Name Sign	Friends	Desk Accessory	March	91	0					9.99
40367	Lady Liberty	Seasonal	Brickheadz	June	153	0	4.8	3.6	3.1	0.33125	9.99
41158	Jasmine's Petite Tower	Disney		January	49	1	5.6	4.8	1.8	0.2	9.99
41159	Cinderella's Carriage Ride	Disney	Juniors	January	91	1	10.3	5.6	2.4	0.53	19.99
41160	Ariel's Castle	Disney	Juniors	January	115	1	10.3	7.5	2.4	0.68	24.99
41161	Aladdin's & Jasmine's Palace Adventures	Disney		January	193	2	10.3	7.5	2.4	0.84	29.99
41162	Ariel, Aurora, & Tiana's Royal Celebration	Disney		January	282	3	11.1	10.3	3	1.1	39.99
41163	Rapunzel's Petite Tower	Disney		January	44	1	5.6	4.8	1.8	0.2	9.99
41164	Enchanted Treehouse	Disney		October	302	3	15	10.3	2.2	1.5	49.99
41165	Anna's Canoe Expedition	Disney	Juniors	October	108	2	10.3	5.5	2.8	0.63125	19.99
41166	Elsa's Wagon Adventure	Disney	Juniors	October	116	1	10.3	7.5	2.4	0.75	29.99
41167	Arendelle Castle Village	Disney		October	521	3	14.9	13.9	2.8	1.65	79.99
41168	Elsa's Jewelry Box	Disney		October	300	1	11.1	10.3	3	0.6	39.99
41169	Olaf	Disney		October	122	0	7.5	5.5	1.8	0.35	14.99
41337	Underwater Loop	Friends		August	389	2	13.9	7.5	2.3	1.05	29.99
41354	Andrea's Heart Box	Friends		January	84	1	7.9	7.5	2.8	0.31	7.99
41355	Emma's Heart Box	Friends		January	85	1	7.9	7.5	2.8	0.31	7.99
41356	Stephanie's Heart Box	Friends		January	85	1	7.9	7.5	2.8	0.29	7.99
41357	Olivia's Heart Box	Friends		January	85	2	7.9	7.5	2.8	0.31	7.99
41358	Mia's Heart Box	Friends		January	83	1	7.9	7.5	2.8	0.31	7.99
41359	Heart Box Friendship Pack	Friends		January	199	2	10.3	7.5	2.4	0.68	19.99
41360	Emma's Mobile Veternary Clinic	Friends		January	50	1	6.2	5.6	1.8	0.22	9.99
41361	Mia's Foal Stable	Friends	Juniors	January	118	1	10.3	7.5	2.4	0.64	19.99
41362	Heartlake City Supermarket	Friends	Juniors	August	140	2	13.9	7.5	2.3	0.8	29.99
41363	Mia's Forest Adventures	Friends		January	134	1	7.5	5.6	1.8	0.33	14.99
41364	Stephanie's Buggy & Trailer	Friends		January	166	1	10.3	7.5	2.4	0.64	19.99
41365	Emma's Art Studio	Friends		January	235	2	10.3	8.7	2.4	0.93	24.99
41366	Olivia's Cupcake Café	Friends		January	335	2	11.1	10.3	3	1.23	29.99
41367	Stephanie's Obstacle Course	Friends		January	337	2	15	10.3	2.2	1.3	39.99
41368	Andrea's Talent Show	Friends		January	492	2	18.9	11.1	2.4	1.59	49.99
41369	Mia's House	Friends		January	715	3	21.3	11.1	3.1	2.47	69.99
41371	Mia's Horse Trailer	Friends		August	216	2	13.9	7.5	2.8	1	29.99
41372	Stephanie's Gymnastics Show	Friends		August	241	2	13.9	7.5	2.4	0.85	29.99
41373	Funny Octopus Ride	Friends		August	324	2	15	10.3	2.2	1.23	39.99
41374	Andrea's Pool Party	Friends		August	468	2	18.9	11.1	2.8	2.2	49.99
41375	Heartlake City Amusement Pier	Friends		August	1251	7	22.9	14.9	4.1	5	129.99
41376	Turtles Rescue Mission	Friends		July	225	2	10.3	7.5	2.4	0.7125	19.99
41378	Dolphins Rescue Mission	Friends		July	363	2	15	10.3	2.2	1.25	39.99
41379	Heartlake City Restaurant	Friends		August	624	3	18.9	11.1	2.4	3	59.99
41380	Lighthouse Rescue Centre	Friends		August	602	2	18.9	11.1	2.8	2.4	59.99
41381	Rescue Mission Boat	Friends		August	908	4	18.9	14.9	3.7	3.85	89.99
41382	Friends Advent Calendar	Friends		September	330	3	15	10.3	2.8	0.85	29.99
41383	Olivia's Hamster Playground	Friends		January	81	1	5.6	4.8	1.8	0.22	9.99
41384	Andrea's Summer Heart Box	Friends		August	83	1	7.9	7.5	2.8	0.3	7.99
41385	Emma's Summer Heart Box	Friends		August	86	1	7.9	7.5	2.8	0.3	7.99
41386	Stephanie's Summer Heart Box	Friends		August	95	1	7.9	7.5	2.8	0.3125	7.99
41387	Olivia's Summer Heart Box	Friends		August	93	1	7.9	7.5	2.8	0.3	7.99
41388	Mia's Summer Heart Box	Friends		August	85	1	7.9	7.5	2.8	0.3	7.99
41634	Emmet	LEGO Movie 2	Brickheadz		113	0	4.8	3.6	3.1	0.3	14.99
41635	Wyldstyle	LEGO Movie 2	Brickheadz		134	0	4.8	3.6	3.1	0.3	14.99
41636	Benny	LEGO Movie 2	Brickheadz		103	0	4.8	3.6	3.1	0.3	9.99
41637	Sweet Mayhem	LEGO Movie 2	Brickheadz		137	0	4.8	3.6	3.1	0.3	9.99
42088	Cherry Picker	Technic		January	155	0	6.2	5.6	2.4	0.35	9.99
42089	Power Boat	Technic		January	174	0	10.3	5.6	2.4	0.57	14.99
42090	Getaway Truck	Technic		January	128	0	10.3	5.6	2.8	0.68	19.99
42091	Police Pursuit	Technic		January	120	0	10.3	5.6	2.4	0.64	19.99
42092	Rescue Helicopter	Technic		January	325	0	11.1	10.3	2.3	0.99	39.99
42093	Chevrolet Corvette ZR1	Technic		January	579	0	13.9	7.5	3.6	1.74	49.99
42094	Tracked Loader	Technic		January	827	0	15	10.3	2.8	2.49	79.99
42095	Remote-Controlled Stunt Racer	Technic		January	324	0	15	10.3	2.8	1.74	99.99
42096	Porsche 911 RSR	Technic		January	1580	0	18.9	14.9	3.7	4.96	149.99
42097	Compact Crawler Crane	Technic		August	920	0	14.9	13.9	3.7	3.5	99.99
42098	Car Transporter	Technic		August	2493	0	22.9	14.9	4.7	7.75	179.99
42099	4x4 X-Treme Off-Roader	Technic		August	958	0	18.9	14.9	4.7	4.8	249.99
42100	Liebherr R 9800	Technic		October	4108	0	22.9	18.9	6.7	14.51	449.99
42110	Land Rover Defender	Technic		October	2573	0	22.9	18.9	3.6	9.35	199.99
43172	Elsa's Ice Palace	Disney		August	701	7	14.9	13.9	2.8	2.89	79.99
60203	Ski Resort	City		September	806	11	18.7	14.8	2.6	3.31	89.99
60206	Jet Patrol	City	Sky Police	January	54	2	6.2	5.5	2.4	0.32	9.99
60207	Drone Chase	City	Sky Police	January	192	3	11.1	10.3	2.3	0.77	29.99
60208	Parachute Arrest	City	Sky Police	January	218	4	11.1	10.3	2.2	1.05	39.99
60209	Diamond Heist	City	Sky Police	January	400	4	18.9	11.1	2.3	1.76	59.99
60210	Air Base	City	Sky Police	January	529	6	21.1	11.1	2.8	2.69	89.99
60212	Barbecue Burn Out	City	Fire	January	64	2	6.2	5.5	1.8	0.29	9.99
60213	Dock Side Fire	City	Fire	January	97	2	10.3	5.5	2.4	0.54	19.99
60214	Burger Bar Fire Rescue	City	Fire	January	327	3	14.9	10.3	2.2	1.34	39.99
60215	Fire Station	City	Fire	January	509	4	14.9	13.9	2.8	2.57	69.99
60216	Downtown Fire Brigade	City	Fire	January	943	7	18.9	14.9	3.5	4.06	99.99
60217	Fire Plane	City	Fire	January	363	3	15	10.3	2.8	1.68	59.99
60218	Desert Rally Racer	City		January	75	1	6.2	5.5	2.4	0.35	9.99
60219	Construction Loader	City		January	88	1	6.2	5.5	2.4	0.34	9.99
60220	Garbage Truck	City	Juniors	January	90	2	10.3	7.5	2.4	0.69	19.99
60221	Diving Yacht	City		January	148	2	10.3	7.5	2.4	0.74	19.99
60222	Snow Groomer	City		January	197	2	10.3	7.5	2.4	0.85	19.99
60223	Harvester Transport	City		January	358	3	13.9	7.5	3.5	1.43	29.99
60224	Satellite Service Mission	City	Space	June	84	1	6.2	5.5	2.4	0.34	9.99
60225	Rover Testing Drive	City	Space	June	202	2	10.3	7.5	2.4	0.8	29.99
60226	Mars Research Shuttle	City	Space	June	273	2	11.1	10.3	2.9	1.34	39.99
60227	Lunar Space Station	City	Space	June	412	5	18.9	11.1	2.3	1.98	59.99
60228	Deep Space Rocket and Launch Control	City	Space	June	837	7	18.9	7.5	3.5	4.03	99.99
60229	Rocket Assembly & Transport	City	Space	June	1055	8	22.8	14.8	3.9	5.23	149.99
60230	People Pack - Space Research & Development	City	Space	June	209	15	10.3	7.5	2.4	0.34	39.99
60231	Fire Chief Response Truck	City	Fire	August	201	2	10.3	7.5	2.8	0.83	29.99
60232	Garage Centre	City	Juniors	August	234	4	15	10.3	2.2	1.37	49.99
60233	Donut Shop Opening	City		August	790	10	18.9	14.9	2.8	3.09	89.99
60234	People Pack - Fun Fair	City		August	183	14	10.3	7.5	1.8	0.61	39.99
60235	City Advent Calendar	City		September	234	8	14.9	10.3	2.8	0.85	29.99
60239	Police Patrol Car	City	Sky Police	January	92	1	6.2	5.5	1.8	0.33	9.99
60240	Kayak Adventure	City		January	84	1	6.2	5.5	1.8	0.33	9.99
70418	J.B.'s Ghost Lab	Hidden Side		August	174	3	10.3	7.5	1.8	0.65	19.99
70419	Wrecked Shrimp Boat	Hidden Side		August	310	4	13.9	7.5	2.3	1.1	29.99
70420	Graveyard Mystery	Hidden Side		August	335	4	13.9	7.5	2.3	1.1	29.99
70421	El Fuego's Stunt Truck	Hidden Side		August	428	4	15	10.3	2.2	1.35	39.99
70422	Shrimp Shack Attack	Hidden Side		August	579	5	18.9	11.1	2.8	2.95	49.99
70423	Paranormal Intercept Bus 3000	Hidden Side		August	689	5	21.3	11.1	2.3	2.56	59.99
70424	Ghost Train Express	Hidden Side		August	698	6	18.9	14.9	2.8	3.75	79.99
70425	Newbury Haunted High School	Hidden Side		August	1474	8	22.9	14.9	3.4	5.2	129.99
70659	Spinjitzu Kai	Ninjago	Spinners	January	97	1	9.4	9.1	2.4	0.29	9.99
70660	Spinjitzu Jay	Ninjago	Spinners	January	97	1	9.4	9.1	2.4	0.29	9.99
70661	Spinjitzu Zane	Ninjago	Spinners	January	109	1	9.4	9.1	2.4	0.29	9.99
70662	Spinjitzu Cole	Ninjago	Spinners	January	117	1	9.4	9.1	2.4	0.31	9.99
70663	Spinjitzu Nya & Wu	Ninjago	Spinners	January	227	2	11.4	9.6	2.4	0.51	19.99
70664	Spinjitzu Lloyd vs Garmadon	Ninjago	Spinners	January	208	2	11.4	9.6	2.4	0.51	19.99
70665	The Samurai Mech	Ninjago		January	154	3	7.5	5.6	1.8	0.35	14.99
70666	The Golden Dragon	Ninjago		January	171	3	8.1	7.5	2.4	0.53	19.99
70667	Kai's Blade Cycle & Zane's Snowmobile	Ninjago		January	376	4	13.9	7.5	2.8	1.12	29.99
70668	Jay's Storm Fighter	Ninjago		January	490	4	15	10.3	2.8	1.54	39.99
70669	Cole's Earth Driller	Ninjago		January	587	4	18.9	11.1	2.9	2.09	49.99
70670	Monastery of Spinjitzu	Ninjago		January	1070	8	18.9	14.9	2.8	3.35	79.99
70671	Lloyd's Journey	Ninjago		August	81	2	6.2	5.5	2.4	0.24	14.99
70672	Cole's Dirt Bike	Ninjago		August	212	3	10.3	7.5	2.4	0.65	19.99
70673	Shuricopter	Ninjago		August	361	3	15	10.3	2.2	1.35	29.99
70674	Fire Fang	Ninjago		August	463	4	11.1	10.3	3	1.54	39.99
70675	Katana 4x4	Ninjago		August	450	5	15	10.3	3.7	1.8	49.99
70676	Lloyd's Titan Mech	Ninjago		August	876	6	14.9	13.9	2.8	3.25	79.99
70677	Land Bounty	Ninjago		August	1178	9	22.9	14.9	3.4	4.5	129.99
70678	Castle of the Forsaken Emperor	Ninjago		August	1218	7	18.9	14.9	3.7	5.5	99.99
70679	The Ultra Dragon	Ninjago		January	951	6	18.9	14.9	2.8	2.69	84.99
70680	Monastery Training	Ninjago		January	122	2	5.6	4.8	2.4	0.29	9.99
70681	Spinjitzu Slam - Lloyd	Ninjago	Spinners	August	70	1	9.4	9.1	2.4	0.3	9.99
70682	Spinjitzu Slam - Jay	Ninjago	Spinners	August	72	1	9.4	9.1	2.4	0.3	9.99
70683	Spinjitzu Slam - Zane	Ninjago	Spinners	August	63	1	9.4	9.1	2.4	0.25	9.99
70684	Spinjitzu Slam - Kai vs Samurai	Ninjago	Spinners	August	164	2	11.4	9.7	2.4	0.55	19.99
70820	LEGO Movie Maker	LEGO Movie 2		January	482	6	15	10.3	2.8	1.67	49.99
70821	Emmet and Benny's 'Build and Fix' Workshop!	LEGO Movie 2	Juniors	January	117	2	10.3	7.5	2.4	0.75	19.99
70822	Unikitty's Sweetest Friends EVER!	LEGO Movie 2		January	76	3	5.6	4.8	1.8	0.18	9.99
70823	Emmet's Thricycle!	LEGO Movie 2		January	174	1	10.3	5.6	2.4	0.55	14.99
70824	Introducing Queen Watevra Wa'Nabi	LEGO Movie 2		January	115	4	8.1	7.5	1.8	0.53	19.99
70825	Queen Watevra's Build Whatever Box!	LEGO Movie 2		January	455	0	10.3	8.7	3.7	1.85	39.99
70826	Rex's Rex-treme Offroader!	LEGO Movie 2		January	236	2	13.9	7.5	2.3	0.97	29.99
70827	Ultrakatty & Warrior Lucy!	LEGO Movie 2		January	348	2	13.9	7.5	2.3	0.9	29.99
70828	Pop-Up Party Bus	LEGO Movie 2		January	1024	4	21.3	11.1	3.1	3.06	79.99
70829	Emmet and Lucy's Escape Buggy!	LEGO Movie 2		January	550	4	15	10.3	2.8	1.72	49.99
70830	Sweet Mayhem's Systar Starship!	LEGO Movie 2		January	502	3	18.9	11.1	2.4	2	69.99
70831	Emmet's Dream House/Rescue Rocket!	LEGO Movie 2		January	706	4	18.9	11.1	2.4	2.51	69.99
70832	Emmet's Builder Box!	LEGO Movie 2		January	125	1	11.2	10.3	2.5	1.72	29.99
70833	Lucy's Builder Box!	LEGO Movie 2		January	141	2	11.2	10.3	2.5	1.68	29.99
70834	MetalBeard's Heavy Metal Motor Trike!	LEGO Movie 2		January	461	2	15	10.3	2.8	1.52	59.99
70835	Rex's Rexplorer!	LEGO Movie 2		January	1187	2	18.9	14.9	3.7	3.66	119.99
70836	Battle-Ready Batman and MetalBeard	LEGO Movie 2		January	168	2	8.1	7.5	1.8	0.53	19.99
70837	Shimmer & Shine Sparkle Spa!	LEGO Movie 2		April	691	8	18.9	11.1	2.4	2.2	69.99
70838	Queen Watevra's 'So-Not-Evil' Space Palace	LEGO Movie 2		April	995	5	18.9	14.9	2.8	3.55	99.99
70839	The Rexcelsior!	LEGO Movie 2		April	1826	4	22.9	14.9	4.7	8.1	149.99
70840	Welcome to Apocalypseburg!	LEGO Movie 2		February	3178	13	22.9	18.9	6.7	14.8	299.99
70841	Benny's Space Squad	LEGO Movie 2		January	68	5	5.6	4.8	1.8	0.2	9.99
70842	Emmet's Triple-Decker Couch Mech	LEGO Movie 2		April	312	3	10.3	7.5	2.4	0.77	29.99
70847	Good Morning Sparkle Babies!	LEGO Movie 2		August	50	4	5.5	4.8	1.8	0.2	9.99
70848	Systar Party Crew	LEGO Movie 2		August	196	2	8.1	7.5	1.8	0.46875	19.99
70849	Wyld-Mayhem Star Fighter	LEGO Movie 2		August	405	4	15	10.3	2.2	1.75	49.99
71044	Disney Train and Station	Disney		September	2925	5	22.9	21.3	5.1	9.45	349.99
75223	Naboo Starfighter Microfighter	Star Wars	Microfighters	January	62	1	5.6	4.8	1.8	0.18	9.99
75224	Sith Infiltrator Microfighter	Star Wars	Microfighters	January	92	1	5.6	4.8	1.8	0.22	9.99
75225	Elite Praetorian Guard Battle Pack	Star Wars		January	109	4	7.5	5.6	1.8	0.26	14.99
75226	Inferno Squad Battle Pack	Star Wars		January	118	4	7.5	5.6	1.8	0.26	14.99
75227	Darth Vader Bust	Star Wars		January	327	0	11.1	10.3	2.3	1.23	39.99
75228	Escape Pod vs Dewbeck Microfighters	Star Wars	Microfighters	January	177	3	10.3	5.6	1.9	0.44	19.99
75229	Death Star Escape	Star Wars		January	329	4	10.3	7.5	2.8	0.97	29.99
75232	Kylo Ren & Sith Trooper	Star Wars	Brickheadz	October	240	0	7.5	5.6	2.8	0.56	19.99
75233	Droid Gunship	Star Wars		January	389	4	11.1	10.3	3	1.43	49.99
75234	AT-AP Walker	Star Wars		January	689	5	14.9	13.9	2.8	2.16	59.99
75235	X-Wing Starfighter Trench Run	Star Wars	Juniors	January	132	3	10.3	7.5	2.4	0.79	29.99
75236	Duel on Starkiller Base	Star Wars		April	191	2	10.3	5.5	2.4	0.63125	19.99
75237	TIE Fighter Attack	Star Wars	Juniors	January	77	2	10.3	5.6	2.4	0.57	19.99
75238	Action Battle Endor Assault	Star Wars		April	193	2	10.3	7.5	2.4	0.7125	29.99
75239	Action Battle Hoth Generator Attack	Star Wars		April	235	2	10.3	7.5	2.4	0.8125	29.99
75240	Major Vonreg's TIE Fighter	Star Wars		April	496	4	15	10.3	2.8	1.7	69.99
75241	Action Battle Echo Base Defense	Star Wars		April	504	6	15	10.3	2.8	1.79	59.99
75242	Black Ace TIE Interceptor	Star Wars		April	396	3	13.9	7.5	2.8	1.3	49.99
75243	Slave I - 20th Anniversary Edition	Star Wars		April	1007	6	18.9	14.9	2.8	4.6	119.99
75244	Tantive IV	Star Wars		May	1768	6	22.9	14.9	4.1	5.9	199.99
75245	Star Wars Advent Calendar	Star Wars		September	280	9	15	10.3	2.8	0.88125	39.99
75246	Death Star Cannon	Star Wars		October	159	2	10.3	5.6	2.4	0.55	19.99
75247	Rebel A-Wing Starfighter	Star Wars	Juniors	January	62	2	7.5	5.6	2.4	0.4	14.99
75248	Resistance A-Wing Starfighter	Star Wars		October	269	2	10.3	7.5	2.8	0.9625	29.99
75249	Resistance Y-Wing Starfighter	Star Wars		October	578	5	15	10.3	2.2	1.68	69.99
75250	Pasaana Speeder Chase	Star Wars		October	373	4	11.1	10.3	2.3	1.05	39.99
75251	Darth Vader's Castle	Star Wars		January	1060	6	18.9	14.9	3.7	5.85	129.99
75252	Imperial Star Destroyer	Star Wars	Ultimate Collector Series	October	4784	2				27.7	699.99
75253	Droid Commander	Star Wars		June	1177	0	21.3	11.1	3.6	4.8	199.99
75254	AT-ST Raider	Star Wars		October	540	4	15	10.3	2.8	1.7	49.99
75255	Yoda	Star Wars		October	1771	1	14.9	13.9	4.7	4.8	99.99
75256	Kylo Ren's Shuttle	Star Wars		October	1005	6	18.9	14.9	3.7	3.7	129.99
75257	Millennium Falcon	Star Wars		October	1351	7	22.9	14.9	3.4	6.5	159.99
75258	Anakin's Podracer - 20th Anniversary	Star Wars		April	279	3	10.3	7.5	2.4	0.8	29.99
75259	Snowspeeder - 20th Anniversary	Star Wars		April	309	4	13.9	7.5	2.3	1.1	39.99
75261	Clone Scout Walker - 20th Anniversary	Star Wars		April	250	5	10.3	7.5	1.8	0.7125	29.99
75262	Imperial Dropship - 20th Anniversary	Star Wars		April	125	5	10.3	5.6	1.8	0.85	19.99
75810	The Upside Down	Stranger Things		June	2287	8	22.9	18.9	3.6	7.3	199.99
75890	Ferrari F40 Competizione	Speed Champions		January	198	1	7.5	5.6	2.4	0.48	14.99
75891	Chevrolet Camaro ZL1 Race Car	Speed Champions		January	198	1	7.5	5.6	2.4	0.51	14.99
75892	McLaren Senna	Speed Champions		January	219	1	7.5	5.6	2.4	0.55	14.99
75893	2018 Dodge Challenger SRT Demon and 1970 Dodge Charger R/T	Speed Champions		January	478	3	13.9	7.5	2.2	1.19	29.99
75894	1967 Mini Cooper S Rally and 2018 MINI John Cooper Works Buggy	Speed Champions		January	481	4	15	10.3	2.8	1.54	49.99
75895	1974 Porshe 911 Turbo 3.0	Speed Champions		September	180	1	7.5	5.6	2.4	0.4375	14.99
75934	Dilophosaurus on the Loose	Jurassic World	Legend of Isla Nublar	July	168	3	10.3	5.6	1.8	0.5	19.99
75935	Baryonyx Face-Off: The Treasure Hunt	Jurassic World	Legend of Isla Nublar	July	434	4	15	10.3	2.8	1.6	59.99
75936	Jurassic Park: T. Rex Rampage	Jurassic World		July	3120	6					249.99
75937	Triceratops Rampage	Jurassic World	Legend of Isla Nublar	July	447	4	15	10.3	3.7	1.9	59.99
75938	T. Rex vs Dino-Mech Battle	Jurassic World	Legend of Isla Nublar	July	716	4	21.3	11.1	3.1	2.65	89.99
75945	Expecto Patronum	Harry Potter		July	121	4	10.3	5.6	1.8	0.4	19.99
75946	Hungarian Horntail Triwizard Challenge	Harry Potter		July	265	4	13.9	7.5	2.3	0.9	29.99
75947	Hagrid's Hut: Buckbeak's Rescue	Harry Potter		July	496	6	15	10.3	2.2	1.6	59.99
75948	Hogwarts Clock Tower	Harry Potter		July	922	8	14.9	13.9	3.7	4.28	89.99
75957	The Knight Bus	Harry Potter		July	403	3	11.1	10.3	3	1.35	39.99
75958	Beauxbaton's Carriage: Arrival at Hogwarts	Harry Potter		August	430	4	15	10.3	2.2	1.4	49.99
75964	Harry Potter Advent Calendar	Harry Potter		September	305	8	15	10.3	2.8	0.88125	39.99
75965	The Rise of Voldemort	Harry Potter		August	184	4	10.3	7.5	1.8	0.61875	19.99
75970	Tracer vs Widowmaker	Overwatch		January	129	2	6.2	5.6	2.4	0.42	14.99
75971	Hanzo vs Genji	Overwatch		January	197	3	10.3	7.5	1.8	0.66	19.99
75972	Dorado Showdown	Overwatch		January	419	3	10.3	8.7	3	1.32	29.99
75973	D.Va & Reinhardt	Overwatch		January	455	2	11.1	10.3	2.3	1.3	39.99
75974	Bastion	Overwatch		January	602	0	15	10.3	2.2	1.7	49.99
75975	Watchpoint: Gibraltar	Overwatch		January	730	4	14.9	13.9	3.7	3.06	89.99
75976	Wrecking Ball	Overwatch		October	227	1	10.3	7.5	2.4	0.61875	19.99
75977	Junkrat & Roadhog	Overwatch		October	380	2	11.1	10.3	3	1.45	49.99
76113	Spider-Man Bike Rescue	Marvel Super Heroes		January	235	3	10.3	7.5	2.4	0.75	19.99
76114	Spider-Man's Crawler	Marvel Super Heroes		January	418	4	11.1	10.3	2.3	1.1	39.99
76115	Spider Mech vs Venom	Marvel Super Heroes		January	604	4	15	10.3	2.8	1.72	49.99
76116	Batman Batsub and the Underwater Clash	DC Super Heroes	Batman	January	174	3	10.3	7.5	2.4	0.7	19.99
76117	Batman Mech vs Poison Ivy Mech	DC Super Heroes	Batman	January	375	4	11.1	10.3	2.3	1.21	39.99
76118	Mr. Freeze Batcycle Battle	DC Super Heroes	Batman	July	200	3	10.3	7.5	2.4	0.66	19.99
76119	Batmobile: Pursuit of the Joker	DC Super Heroes	Batman	August	342	2	13.9	7.5	2.8	1.15	29.99
76120	Batwing and The Riddler Heist	DC Super Heroes	Batman	August	489	4	15	10.3	2.8	1.65	49.99
76122	Batcave Clayface Invasion	DC Super Heroes	Batman	August	1038	6	18.9	14.9	2.8	4.35	99.99
76123	Captain America: Outriders Attack	Marvel Super Heroes	Avengers	April	167	4	10.3	7.5	1.8	0.55	19.99
76124	War Machine Buster	Marvel Super Heroes	Avengers	April	362	4	10.3	8.7	2.4	0.9	34.99
76125	Iron Man Hall of Armor	Marvel Super Heroes	Avengers	April	524	6	15	10.3	2.8	1.67	59.99
76126	Avengers Ultimate Quinjet	Marvel Super Heroes	Avengers	April	838	6	21.3	11.1	3.1	3	79.99
76127	Captain Marvel and the Skrull Attack	Marvel Super Heroes		January	307	3	13.9	7.5	2.3	0.9	29.99
76128	Molten Man Battle	Marvel Super Heroes	Spider-Man: Far From Home	April	294	3	10.3	8.7	2.4	0.8625	29.99
76129	Hydro-Man Attack	Marvel Super Heroes	Spider-Man: Far From Home	April	471	4	11.1	10.3	3	1.52	39.99
76130	Stark Jet and the Drone Attack	Marvel Super Heroes	Spider-Man: Far From Home	April	504	4	15	10.3	2.8	1.41	69.99
76131	Avengers Compound Battle	Marvel Super Heroes	Avengers	April	699	7	18.9	14.9	2.8	2.85	99.99
76133	Spider-Man Car Chase	Marvel Super Heroes	Juniors	January	52	2	7.5	5.6	1.8	0.35	9.99
76134	Spider-Man: Doc Ock Diamond Heist	Marvel Super Heroes	Juniors	January	150	3	10.3	8.7	3	1.17	29.99
76137	Batman vs The Riddler Robbery	DC Super Heroes	Juniors	August	59	2	7.5	5.6	1.8	0.25	9.99
76138	Batman and the Joker Escape	DC Super Heroes	Juniors	August	171	4	10.3	8.7	3	1.1	39.99
76139	1989 Batmobile	DC Super Heroes	Batman	November	3306	3					249.99
80103	Dragon Boat Race	Seasonal	Chinese New Year	July	643	15	15	10.3	2	1.85	49.99
